# Supplementary material for: Concomitant Bladder Tumor Is a Risk Factor for Bladder Recurrence but Not Upper Tract
Source: MDPI journal article supplement (doi:10.3390/curroncol29120727), 2022-11-28
Supplement: s1 [file s1]

**Table S1.** Multivariate Cox regression analyses on cancer-specific survival.

| Characteristics           | HR (95%CI)                 | <i>p</i> -value |
|---------------------------|----------------------------|-----------------|
| Concomitant bladder tumor |                            |                 |
| No                        | Reference                  |                 |
| Yes                       | 1.073 (0.293-3.928)        | 0.915           |
| Age                       |                            |                 |
| <70                       | Reference                  |                 |
| ≥70                       | 2.373 (0.867-6.499)        | 0.093           |
| Gender                    |                            |                 |
| Female                    | Reference                  |                 |
| Male                      | 0.785 (0.258-2.393)        | 0.670           |
| Smoking status            |                            |                 |
| No                        | Reference                  |                 |
| Yes                       | 1.595 (0.530-4.797)        | 0.406           |
| ASA                       |                            |                 |
| I-II                      | Reference                  |                 |
| III-V                     | 1.824 (0.747-4.453)        | 0.187           |
| CCI                       |                            |                 |
| 0                         | Reference                  |                 |
| 1-2                       | 1.122 (0.375-3.354)        | 0.837           |
| 3-10                      | 1.450 (0.443-4.744)        | 0.539           |
| RNU                       |                            |                 |
| No                        | Reference                  |                 |
| Yes                       | <0.001 (<0.001-1.429E+227) | 0.964           |
| Tumor stage               |                            |                 |
| <pT2                      | Reference                  |                 |
| ≥pT2                      | 5.851 (1.315-26.041)       | 0.020           |
| Tumor grade               |                            |                 |
| G1                        | Reference                  |                 |
| G2                        | <0.001 (<0.001-7.794E+141) | 0.948           |
| G3                        | 2.626 (0.326-21.178)       | 0.365           |
| Multifocal tumor          |                            |                 |
| No                        | Reference                  |                 |
| Yes                       | 0.638 (0.242-1.681)        | 0.363           |

ASA: American Society of Anesthesiologists; CCI: Charlson Comorbidity Index; RNU: Radical nephroureterectomy.

**Table S2.** Multivariate Cox regression analyses on overall survival.

| Characteristics           | HR (95%CI)           | <i>p</i> -value |
|---------------------------|----------------------|-----------------|
| Concomitant bladder tumor |                      |                 |
| No                        | Reference            |                 |
| Yes                       | 2.008 (0.944-4.269)  | 0.070           |
| Age                       |                      |                 |
| <70                       | Reference            |                 |
| ≥70                       | 2.190 (1.033-4.642)  | 0.041           |
| Gender                    |                      |                 |
| Female                    | Reference            |                 |
| Male                      | 1.048 (0.426-2.581)  | 0.918           |
| Smoking status            |                      |                 |
| No                        | Reference            |                 |
| Yes                       | 0.947 (0.426-2.106)  | 0.895           |
| ASA                       |                      |                 |
| I-II                      | Reference            |                 |
| III-V                     | 1.695 (0.859-3.345)  | 0.128           |
| CCI                       |                      |                 |
| 0                         | Reference            |                 |
| 1-2                       | 1.606 (0.653-3.954)  | 0.302           |
| 3-10                      | 2.239 (0.853-5.874)  | 0.102           |
| RNU                       |                      |                 |
| No                        | Reference            |                 |
| Yes                       | 0.214 (0.028-1.642)  | 0.138           |
| Tumor stage               |                      |                 |
| <pT2                      | Reference            |                 |
| ≥pT2                      | 1.902 (0.902-4.010)  | 0.091           |
| Tumor grade               |                      |                 |
| G1                        | Reference            |                 |
| G2                        | 1.001 (0.198-5.067)  | 0.999           |
| G3                        | 2.465 (0.555-10.945) | 0.236           |
| Multifocal tumor          |                      |                 |
| No                        | Reference            |                 |
| Yes                       | 0.870 (0.430-1.758)  | 0.698           |

ASA: American Society of Anesthesiologists; CCI: Charlson Comorbidity Index; RNU: Radical nephroureterectomy.
